## CALCIUM AND POTASSIUM CURRENTS IN LEG MOTONEURONS DURING POSTEMBRYONIC DEVELOPMENT IN THE HAWKMOTH *MANDUCA SEXTA*

BY JON H. HAYASHI<sup>1</sup> AND RICHARD B. LEVINE<sup>1,2</sup>

<sup>1</sup>*Division of Neurobiology* and <sup>2</sup>*Department of Physiology,*  
*University of Arizona, Tucson, AZ 85721, USA*

*Accepted 30 June 1992*

### Summary

During insect metamorphosis the nervous system is reorganized to accommodate changes in behavior. In the hawkmoth, *Manduca sexta*, many identified larval motoneurons persist to innervate new adult muscles, while undergoing changes in dendritic morphology and synaptic connections. The thoracic leg motoneurons, for example, innervate different sets of muscles in the larva and adult and participate in distinct types of locomotor behavior in the two stages of life. To determine whether changes in the biophysical properties of these motoneurons accompany the structural and functional modifications that have been described, we used the whole-cell voltage-clamp technique to compare the  $\text{Ca}^{2+}$  and  $\text{K}^{+}$  currents expressed by leg motoneurons isolated from the larval, pupal and adult stages of *Manduca*. After 24 h in culture, the somata of leg motoneurons isolated from all three stages expressed voltage-sensitive  $\text{Ca}^{2+}$  currents that could be blocked by  $\text{Cd}^{2+}$ ,  $\text{Co}^{2+}$  or  $\text{Ni}^{2+}$ . The currents were larger with  $\text{Ba}^{2+}$  as the charge carrier. The  $\text{Ca}^{2+}$  current density was significantly lower in these motoneurons during the early pupal stage than in either the larva or adult. Similar experiments revealed both transient and sustained  $\text{K}^{+}$  currents in the leg motoneurons that could be blocked with  $\text{Cs}^{+}$ . There was a significant decrease in the density of the transient, inactivating outward current in leg motoneurons isolated from the early pupal stage. Thus, the levels of some types of ionic currents are modulated during metamorphosis. These changes may be important for the developmental or behavioral changes that accompany metamorphosis.

### Introduction

During insect metamorphosis identified larval motoneurons persist to participate in adult behavior (Levine and Weeks, 1990). In some cases the persistent motoneurons innervate the same muscle throughout life (Levine and Truman, 1985), but in other instances the larval targets degenerate and are replaced by new target muscles in the adult (Levine and Truman, 1985; Weeks and Ernst-

Key words: *Manduca sexta*, cell culture, metamorphosis, potassium current, calcium current, voltage clamp, insect nervous system.

Utzschneider, 1989; Kent and Levine, 1988b). Such is the case for the motoneurons that innervate the thoracic legs of the hawkmoth *Manduca sexta*. These motoneurons survive the degeneration of the larval leg muscles to innervate adult muscles that form from imaginal tissue during adult development (Kent and Levine, 1988b).

The dendritic structures and synaptic interactions of the thoracic leg motoneurons change markedly during metamorphosis, as might be expected given the dramatic differences between leg movement and structure in the larva and adult (Kent and Levine, 1988a,b). Little is known, however, about the intrinsic functional properties of these motoneurons. The roles of different membrane currents in the production of patterned motor activity during locomotion have never been investigated, nor is it known whether the types of ion channels expressed by the leg motoneurons change during metamorphosis as functional requirements are modified.

Changes in ion channel expression during development have been documented in several systems (McCobb *et al.* 1989; O'Dowd *et al.* 1988; Salkoff and Wyman, 1981a) where different types of channels appear in a stereotyped sequence. This sequential appearance, in addition to reflecting the orderly differentiation of mature characteristics, may be important for certain developmental processes. For example, the expression of  $\text{Ca}^{2+}$  currents may be modulated during development to regulate neurite outgrowth or synapse formation (Mattson and Kater, 1987; Holliday and Spitzer, 1990). Since similar developmental processes are associated with metamorphosis, changes in the expression of ion channels may be important during this time.

Voltage-dependent ion channels have been investigated using cultured neurons from *Drosophila melanogaster* (O'Dowd and Aldrich, 1988; Solc and Aldrich, 1988; Saito and Wu, 1991; Baker and Salkoff, 1990; Byerly and Leung, 1988; Leung and Byerly, 1991) or other insects (Christensen *et al.* 1988; Hayashi and Hildebrand, 1990). It is difficult in such culture systems, however, to distinguish different cell types and to relate the biophysical information to behavior. Insights into sensory processing and motor function have been provided by biophysical analyses of identified neurons in insects (Thomas, 1984; Nightingale and Pitman, 1989; Laurent, 1991; Lapied *et al.* 1990; Hardie and Weckstrom, 1990; Zufall *et al.* 1991). We have, therefore, chosen to describe the types of ion channels expressed by identified motoneurons from *Manduca sexta*, where a great deal of information is available about the neural circuits underlying behavior and the metamorphic fates of identified neurons (Levine and Weeks, 1990). A detailed understanding of the types of ion channels expressed by insect neurons at different stages will provide a valuable model for exploring the regulation of neuronal differentiation. The accessibility of the nervous system during metamorphosis facilitates the identification and analysis of individual neurons, which is often not possible during embryonic development. Moreover, detailed information about the hormonal regulation of metamorphic development is available (Levine and Weeks, 1990). The recent characterization of the genes encoding different types of voltage-gated

ion channels in *Drosophila* (Atkinson *et al.* 1991; Kamb *et al.* 1987; Papazian *et al.* 1987) opens the possibility of examining regulation at the molecular level.

To investigate the types of voltage-sensitive currents expressed by the thoracic leg motoneurons in *Manduca*, we have applied the whole-cell patch-clamp technique to neurons maintained *in vitro*. This was accomplished using techniques that were adapted from those devised for the maintenance of dissociated interneurons from the antennal lobes of *Manduca* (Hayashi and Hildebrand, 1990). The leg motoneurons were labelled with a vital dye prior to dissociation to facilitate their identification after dissociation of ganglia from animals of different stages (Prugh *et al.* 1992). We find that the leg motoneurons express a variety of voltage-sensitive currents and that the levels of these currents change during metamorphosis. Some of these results have been reported previously in abstract form (Levine and Hayashi, 1990).

## Materials and methods

### *Animals*

*Manduca sexta* (L.) (Lepidoptera: Sphingidae) were reared from eggs on artificial diet (modified from Bell and Joachim, 1976) on a long-day photoperiod regimen (17 h light/7 h dark) at 26°C and 50–60% relative humidity. Following hatching, larvae feed continually and pass through five larval instars. Near the end of the last (fifth) larval instar, in response to changes in the ecdysteroid and juvenile hormone titers, animals begin metamorphosis. Adult development begins soon after the molt of the larva into the pupa and proceeds through 18 stages, corresponding roughly to days 0–18 (P0–P18). Pupae were staged as previously described (Sanes and Hildebrand, 1976; Tolbert *et al.* 1983).

### *Preparation of cultures*

The thoracic ganglia were dissociated and maintained in culture using a modification of techniques that were originally developed for central antennal neurons in *Manduca* (Hayashi and Hildebrand, 1990). To obtain neurons from different stages of development, animals were dissected at stage L1 (day 2 of the last larval instar), stage P0 (the first day of the pupal stage) or stage P18 (at the end of adult development, but before emergence). For most experiments the three thoracic ganglia were dissected from two animals in sterile insect saline (see below) and pinned in a Sylgard-lined Petri dish. One surface of each ganglion was treated for 1 min with a 3% solution of collagenase/dispase (Boehringer Mannheim), then the ganglia were desheathed and separated from the interganglionic connectives and peripheral nerves. The individual desheathed ganglia were transferred to a test tube containing supplemented saline (see below; Hayashi and Hildebrand, 1990).

The following procedures were performed in a hood under aseptic conditions. The ganglia to be dissociated were transferred to a tube with Hanks Ca<sup>2+</sup>- and Mg<sup>2+</sup>-free balanced salt solution containing 0.5 mg ml<sup>-1</sup> collagenase and

2 mg ml<sup>-1</sup> dispase, incubated for 5 min at 37°C, then dispersed by trituration with a fire-polished Pasteur pipette. The action of the enzymes was terminated by centrifuging the cells first through 6 ml of supplemented saline, and then through 6 ml of medium (see below). The pellet was resuspended in sufficient medium to allow 100 µl for each culture dish (usually six dishes were used for six thoracic ganglia). The cells were allowed to settle and adhere to the coated surface of the culture dish (see below) for 2 h, after which the dish was filled with 2 ml of medium. The cultures were maintained at 26°C in a humidified incubator. Normally this procedure resulted in 5–10 motoneurons per dish.

Cells were grown in miniwells made by cutting an 8 mm hole in the bottom of a plastic 35 mm culture dish. Glass coverslips were sealed to the bottom of the dishes with Sylgard (Dow Corning). After ultraviolet sterilization, the glass was coated by exposure to a solution of 200 µg ml<sup>-1</sup> concanavalin A and 2 µg ml<sup>-1</sup> laminin for 2 h at 37°C. The dishes were then rinsed with sterile distilled water and air-dried in a sterile hood.

The contents of the solutions used were derived from Hayashi and Hildebrand (1990).

*Insect saline.* NaCl, 100 mmol l<sup>-1</sup>; KCl, 4 mmol l<sup>-1</sup>; CaCl<sub>2</sub>, 6 mmol l<sup>-1</sup>; Hepes, 10 mmol l<sup>-1</sup>, pH 7; and glucose, 5 mmol l<sup>-1</sup>; adjusted to 360 mosmol l<sup>-1</sup> with mannitol.

*Supplemented saline.* NaCl, 149.9 mmol l<sup>-1</sup>; KCl, 3 mmol l<sup>-1</sup>; CaCl<sub>2</sub>, 3 mmol l<sup>-1</sup>; MgCl<sub>2</sub>, 0.5 mmol l<sup>-1</sup>; Tes 10 mmol l<sup>-1</sup>; D-glucose, 11 mmol l<sup>-1</sup>; lactalbumin hydrolysate 6.5 g l<sup>-1</sup>; TC Yeastolate (Difco) 5 g l<sup>-1</sup>; 10% foetal bovine serum (FBS); penicillin 100 units ml<sup>-1</sup>; streptomycin 100 µg ml<sup>-1</sup>; pH 7; 360 mosmol l<sup>-1</sup>.

*Culture medium.* To 500 ml of Leibovitz's L15 (Gibco) were added: alpha-ketoglutaric acid 185 mg, fructose 200 mg, glucose 350 mg, malic acid 335 mg, succinic acid 30 mg, TC yeastolate 1.4 gm, lactalbumin hydrolysate 1.4 gm, niacin 0.01 mg, imidazole 30 mg, streptomycin 100 µg ml<sup>-1</sup>, penicillin 100 units ml<sup>-1</sup>, 20-hydroxyecdysone 1 µg ml<sup>-1</sup> (Sigma) and stable vitamin mix 2.5 ml. A 5 ml stock solution of vitamin mix consists of: aspartic acid 15 mg, cystine 15 mg, beta-alanine 5 mg, biotin 0.02 mg, vitamin B<sub>12</sub> 2 mg, inositol 10 mg, choline chloride 10 mg, lipoic acid 0.05 mg, *p*-aminobenzoic acid 5 mg, fumaric acid 25 mg, coenzyme A 0.4 mg, glutamic acid 15 mg, Phenol Red 0.5 mg. The medium was adjusted to pH 7, and 360 mosmol l<sup>-1</sup>. Both the supplemented saline and the medium were filter-sterilized prior to use.

#### *Identification of cells in culture*

Thoracic leg motoneurons were labelled soon after entering the fifth larval instar by injecting the vital lipophilic carbocyanine dye DiI (C<sub>18</sub>; Molecular Probes catalogue no. 282, 2.5 µg ml<sup>-1</sup> in 100% ethanol; Honig and Hume, 1986) into their target muscles in the larval legs (Kent and Levine, 1988b; Griffin and Levine, 1989). The dye was allowed to diffuse to the motoneuron somata in the thoracic ganglia. Within 2 days, labelled somata were visible in the thoracic ganglia, and

these remained labelled for the duration of adult development (Kent and Levine, 1988b, 1992). Cells labeled in this manner could be identified under fluorescent illumination in cultures derived from ganglia dissociated at any stage of metamorphic adult development. The labelled cells remained viable in culture for up to 4 weeks (Griffin and Levine, 1989; Prugh *et al.* 1992). Normally, DiI was injected into the region of many of the leg muscles in all six legs of the animal so that several (10–20) motoneurons were labelled in each ganglion. In the experiments that follow, therefore, we did not necessarily record from the same leg motoneuron each time. All thoracic leg motoneurons share the same fate during metamorphosis (Kent and Levine, 1988b).

#### *Biophysical techniques*

The data reported in this paper are based on records from 58 motoneurons in 42 experiments. Records were obtained from the neurons 18–24 h after plating, before the cells had grown significant processes (Fig. 1). Membrane currents were recorded using the whole-cell configuration of the patch-clamp technique (Hamill *et al.* 1981; Fenwick *et al.* 1982) using an Axopatch 1-B or 1-D amplifier (Axon Instruments). Patch-clamp electrodes with resistances between 1 and 3 m $\Omega$  were fabricated from borosilicate glass with a Narishige PP-83 puller. Gigaohm seals between the electrode and the cell membrane were easily formed after the culture medium had been replaced by a recording medium that lacked fetal bovine serum (see below). Junction potentials were nulled prior to seal formation. Intracellular access was achieved by rupturing the membrane beneath the electrode with a combination of suction and a brief high-voltage pulse.

Data were gathered and analyzed using pClamp software (Axon Instruments, version 5.1) run on an IBM-compatible '386' computer. Membrane currents were routinely filtered at 10 kHz with a four-pole Bessel filter and sampled at intervals of 100  $\mu$ s. Three runs were averaged for each voltage step. Linear leakage currents were subtracted electronically from all records. The pipette resistances were low (1–3 m $\Omega$ ; see above), and upper estimates of the series resistance (as calculated from the capacitive charging transient) were always less than 5 M $\Omega$ . Nevertheless, significant discrepancies between actual and measured values of the membrane voltage may have arisen during the measurement of the largest peak currents, which approached 8 nA in some cells. When possible, the series resistance was compensated electronically at 70–90%. The current/voltage ( $I/V$ ) plots and records shown in most figures were obtained under these conditions, suggesting a maximum voltage error (with a peak current of 7 nA) of 3–10 mV. The accuracy of the measurements was evaluated by comparing the voltage sensitivity of inward current activation in cells with large currents to that under conditions in which the current was reduced by decreasing the Ba<sup>2+</sup> concentration to one-twelfth of the normal level (see below), by comparing Ca<sup>2+</sup> to Ba<sup>2+</sup> currents, or by investigating neurons with small inward currents. In these cases the voltage-sensitivity of activation was similar to that of cells with large inward currents.

In most cases, the capacitive currents that could not be compensated electroni-

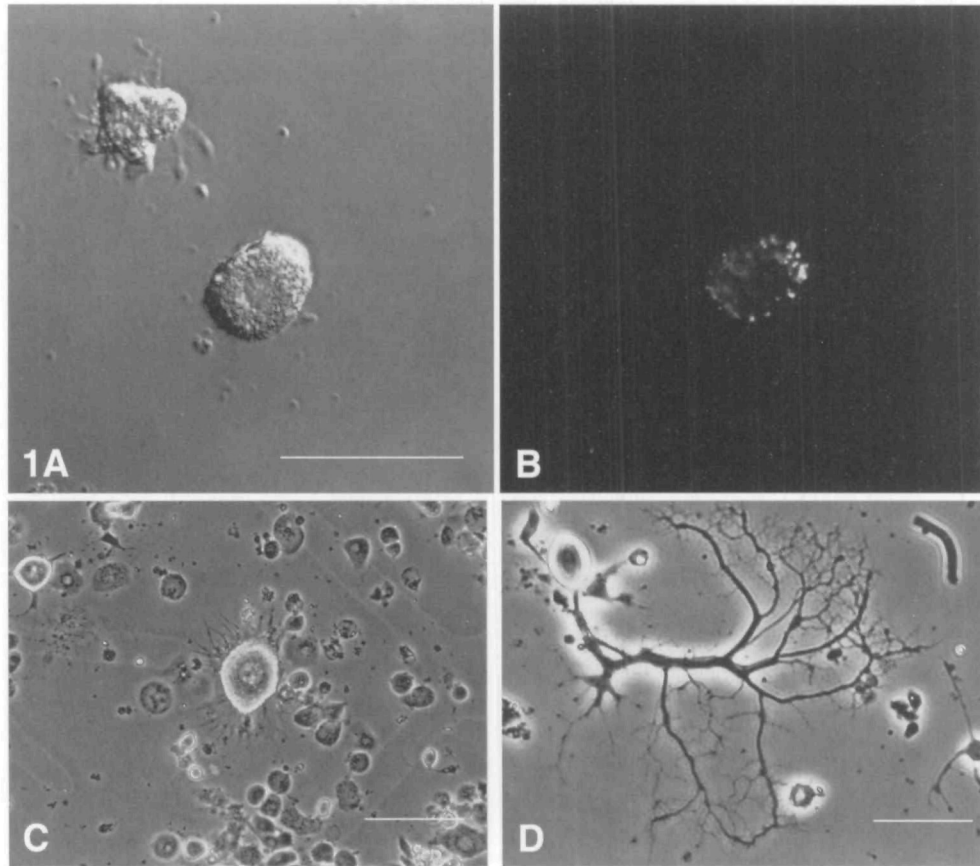

Fig. 1. Photographs of leg motoneurons in culture. (A) Leg motoneuron from a thoracic ganglion of a stage P0 pupa; 24 h *in vitro*. The cell body is viewed at 400 $\times$  with Hoffmann differential interference contrast optics. Note the absence of extensive processes. (B) Same cell as A viewed under fluorescence illumination to reveal punctate DiI labelling. The larval legs of this animal had been injected with DiI. After dissociation of the thoracic ganglia several days later at stage P0, the leg motoneurons could be identified by virtue of the DiI labelling. (C) Another leg motoneuron like that shown in A, but viewed at 200 $\times$  under phase optics. Note the halo of processes. (D) A leg motoneuron after 1 week in culture. Scale bars, 50  $\mu$ m.

cally were removed from the records digitally by subtracting from the total current the linear current scaled up from that induced by a 10–20 mV step in a non-active region of the membrane potential. Estimates of the whole-cell capacitance for the calculation of current density were obtained from the time constant of the membrane charging transient during a voltage step from  $-70$  mV to  $-90$  mV.

To record  $K^+$  currents, the cells were superfused with insect saline (Hayashi and Hildebrand, 1990) that consisted of NaCl, 100 mmol l $^{-1}$ ; KCl, 4 mmol l $^{-1}$ ; CaCl $_2$ , 6 mmol l $^{-1}$ ; Hepes, 10 mmol l $^{-1}$ , pH 7; and glucose, 5 mmol l $^{-1}$ . In most experiments Ba $^{2+}$  replaced Ca $^{2+}$  to improve current isolation. Tetrodotoxin (TTX;

$10^{-8} \text{ mol l}^{-1}$ ; Sigma) was added to block  $\text{Na}^+$  channels, and  $5 \times 10^{-4} \text{ mol l}^{-1} \text{ CdCl}_2$  was added to abolish the  $\text{Ca}^{2+}$  currents. Alternatively,  $\text{Ca}^{2+}$  currents were blocked by replacing  $\text{Ca}^{2+}$  with equimolar  $\text{Ni}^{2+}$ . The osmolarity was set at  $360 \text{ mosmol l}^{-1}$  with mannitol. The pipette solution consisted of potassium aspartate or KCl,  $150 \text{ mmol l}^{-1}$ ;  $\text{MgCl}_2$ ,  $2 \text{ mmol l}^{-1}$ ; NaCl,  $10 \text{ mmol l}^{-1}$ ;  $\text{CaCl}_2$ ,  $1 \text{ mmol l}^{-1}$ ; and EGTA  $11 \text{ mmol l}^{-1}$ . The pH was adjusted to 7 with Hepes ( $5 \text{ mmol l}^{-1}$ ) and the osmolarity was set at  $321 \text{ mosmol l}^{-1}$  with mannitol.

To record currents through  $\text{Ca}^{2+}$  channels, the cells were superfused with modified saline in which  $\text{CaCl}_2$  was replaced by  $\text{BaCl}_2$  ( $6 \text{ mmol l}^{-1}$ ), and TTX ( $10^{-8} \text{ mol l}^{-1}$ ) and tetraethylammonium chloride ( $\text{TEA}^+$ ,  $30 \text{ mmol l}^{-1}$ ; Sigma) were added to block  $\text{Na}^+$  and some  $\text{K}^+$  currents, respectively. The intracellular solution in these experiments resembled the solution used to record  $\text{K}^+$  currents, except that CsCl ( $150 \text{ mmol l}^{-1}$ ) was used in place of potassium salts. In some experiments the  $\text{Ba}^{2+}$  was partially replaced ( $0.5 \text{ mmol l}^{-1} \text{ BaCl}_2/5.5 \text{ mmol l}^{-1} \text{ MgCl}_2$ ) to reduce the inward current magnitude.

Intracellular recordings from the cultured motoneurons were obtained by impaling the cell body with microelectrodes fashioned with a Brown and Flaming puller (Sutter Instruments) from fiber-filled glass microcapillary tubes (Fred Haer). When filled with  $2 \text{ mol l}^{-1}$  potassium acetate the electrodes had resistances between 75–100 M $\Omega$ . Records were obtained using an Axoclamp 2A microelectrode amplifier (Axon Instruments) and recorded on video tape (Vetter Instruments).

## Results

### *Intracellular recording*

The leg motoneurons could be identified *in vitro* by virtue of the fluorescent label (Fig. 1). The motoneurons could also be recognized by their large somata. After a day in culture, these cells have formed a halo of neurites but lack the extensive arborizations that develop over 3–4 weeks *in vitro* (Fig. 1; Prugh *et al.* 1992). Leg motoneurons isolated from all three stages and examined after 18–24 h in culture had resting membrane potentials of  $-60$  to  $-70 \text{ mV}$  and generated action potentials in response to the injection of depolarizing current through an intracellular microelectrode (Fig. 2, stages P0 and P18; stage L1 not shown). These resting potentials are similar to those normally observed *in vivo* (Kent and Levine, 1988a). Ion substitution experiments suggested that both  $\text{Na}^+$  and  $\text{Ca}^{2+}$  currents contribute to the rising phase of the action potential. Action potentials that were evoked from a depolarized membrane potential ( $-35 \text{ mV}$ ) were increased in width compared to those evoked from more hyperpolarized membrane potentials ( $-60 \text{ mV}$ ), especially in motoneurons from stage P18 (Fig. 2B). Thus, inactivating outward currents may contribute to the repolarizing phase of the action potential (McCobb *et al.* 1990). These currents are considered in more detail below.

The somata of the leg motoneurons, like those of most insect motoneurons, do

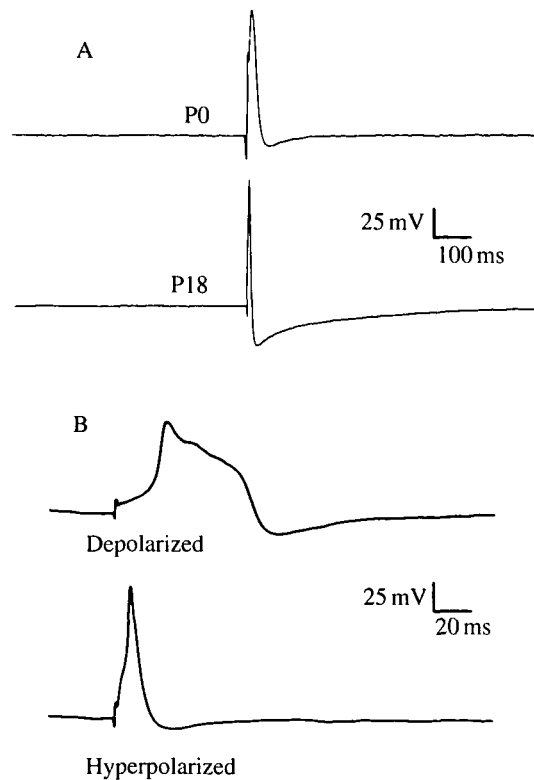

Fig. 2. Intracellular recordings from cultured leg motoneurons. (A) Intracellular recordings from leg motoneurons isolated from stage P0 and P18 animals and maintained for 24 h in culture. (B) Leg motoneuron from stage P18. In the top trace the membrane potential has been depolarized from  $-60$  to  $-35$  mV by passing positive current through the intracellular electrode. Note the increased width of the action potential.

not generate overshooting action potentials *in vivo* (Kent and Levine, 1988a). Following treatment with  $\text{TEA}^+$  *in vivo*, however, large plateau-like potentials may be recorded from the somata of the leg motoneurons (Levine and Ramirez, 1991), as has been observed in other insects (Goodman and Heitler, 1979; Pitman, 1979). Intracellular EGTA has also been shown to enable action potential production in normally inexcitable insect motoneuron somata (Pitman, 1979). Also possibly relevant to the present observation is that the somata of insect motoneurons are capable of generating overshooting action potentials *in vivo* following a period of anoxia (Pitman, 1988), axotomy or treatment with colchicine (Pitman, 1975; Pitman *et al.* 1972; Goodman and Heitler, 1979). The somata of the isolated leg motoneurons may be expressing ion channels that would normally be destined for other regions of the cell in addition to those that are normally present, or the isolated somata may include membrane from processes that were retracted during the dissociation procedure. Similar production of action potentials has been



observed in previous studies of acutely isolated insect neuron somata (Lees *et al.* 1987).

#### Calcium currents

To isolate voltage-activated inward currents, outward currents were blocked by replacing  $K^+$  with  $Cs^+$  in the internal solution and adding  $TEA^+$  ( $30 \text{ mmol l}^{-1}$ ) to the external solution (see Materials and methods). Immediately after establishing the whole-cell clamp configuration, large outward currents were observed in response to depolarizing voltage commands, but these disappeared after 1–2 min. Our interpretation is that  $TEA^+$ -resistant outward currents are present and that these are blocked as the  $Cs^+$ -containing pipette solution replaces the cytoplasm of the cell.

After blockade of the outward currents, depolarizing voltage commands activated inward currents with both transient and sustained components. Current traces from a whole-cell patch-clamp recording made from a leg motoneuron after 1 day in culture are presented in Fig. 3A. This example was selected because the sustained inward current was particularly small in this cell. A fast, transient inward current with a threshold of about  $-45 \text{ mV}$  was activated by depolarizing commands (Fig. 3B). Motoneurons from all the stages examined expressed the fast, transient inward current when recorded after 18 h in culture. Although not considered in detail in the present study, this transient current was blocked by TTX ( $10^{-8} \text{ mol l}^{-1}$ ) and may represent a  $Na^+$  current that contributes to the action potentials recorded *in vitro*. The TTX block was irreversible after up to 1 h of washing in TTX-free saline.

To isolate the sustained inward current, the fast, transient inward current was blocked with TTX and the outward currents were blocked as described. In addition,  $Ba^{2+}$  replaced  $Ca^{2+}$  as the divalent cation. Under these conditions, a prolonged inward current was revealed that activated in response to voltage commands more depolarized than  $-40 \text{ mV}$  and peaked at about  $-10 \text{ mV}$  (Fig. 4). With  $Ca^{2+}$  as the divalent cation in the external solution rather than  $Ba^{2+}$ , the peak amplitude of the inward current was smaller, and there was a faster decline of the current during the voltage step (Fig. 5A,B). The voltage-sensitivity of activation, however, was similar to that in  $Ba^{2+}$  (Fig. 5C). The  $Ca^{2+}$  or  $Ba^{2+}$  currents could be blocked reversibly by substituting equimolar  $Co^{2+}$ ,  $Ni^{2+}$  or  $Mg^{2+}$  in the external solution (Fig. 6A). Adding  $Cd^{2+}$  ( $5 \times 10^{-4} \text{ mol l}^{-1}$ ) to the  $Ba^{2+}$  solution blocked the inward current (Fig. 6B). The block was irreversible (not shown). A small outward current remained in the presence of  $Cd^{2+}$ ,  $TEA^+$  and internal  $Cs^+$ , as has been observed in other systems (Lewis and Hudspeth, 1983). Taken together, these results suggest that the leg motoneurons express voltage-sensitive  $Ca^{2+}$  channels. The voltage-sensitivity of the  $Ca^{2+}$  current in these motoneurons is similar to that reported in other insect systems (Byerly and Leung, 1988).

Steady-state inactivation of the  $Ca^{2+}$  or  $Ba^{2+}$  current was measured with double-pulse experiments in which the cells were held at  $-70 \text{ mV}$  and given 120 ms

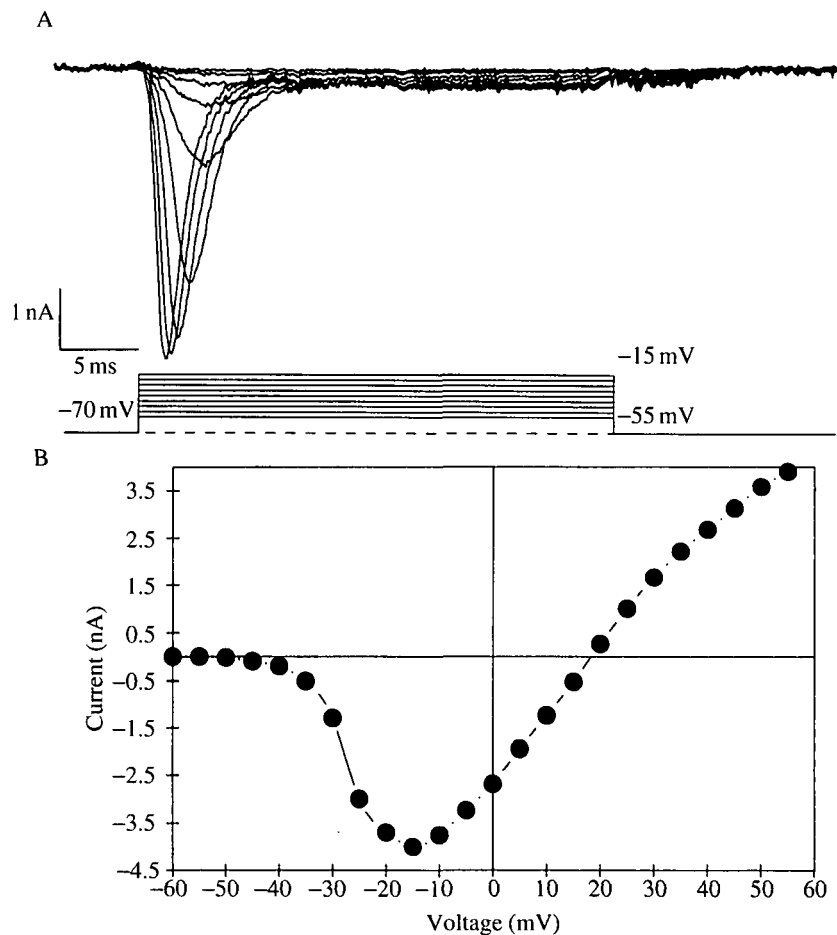

Fig. 3. The fast, transient inward current. This motoneuron was isolated from a stage P0 animal and maintained overnight in culture. Whole-cell voltage-clamp records are shown, with normal saline externally and  $150 \text{ mmol l}^{-1}$  CsCl internally. (A) In the absence of TTX, depolarizing voltage commands evoke a fast inward current. This was followed by a small, sustained inward current. (B) Voltage-dependence of the peak inward current.

pre-pulses of various magnitudes, followed by test pulses to a membrane potential of  $-10 \text{ mV}$ . Steady-state inactivation reached a maximum with pre-pulses more depolarized than  $-20$  to  $-10 \text{ mV}$  (Fig. 7). A small sustained inward current persisted for several minutes when the cells were maintained at depolarized holding potentials. Voltage steps from a holding potential of  $-20 \text{ mV}$  suggest that the voltage threshold and peak of the sustained current occur at membrane potentials that are approximately  $15$ – $20 \text{ mV}$  more depolarized than those of the inactivating  $\text{Ba}^{2+}$  current (Fig. 8). Thus, a relatively large component of the  $\text{Ba}^{2+}$  current inactivates slowly with prolonged depolarizing steps, leaving a smaller non-inactivating component. Similar results were obtained with  $\text{Ca}^{2+}$  as the

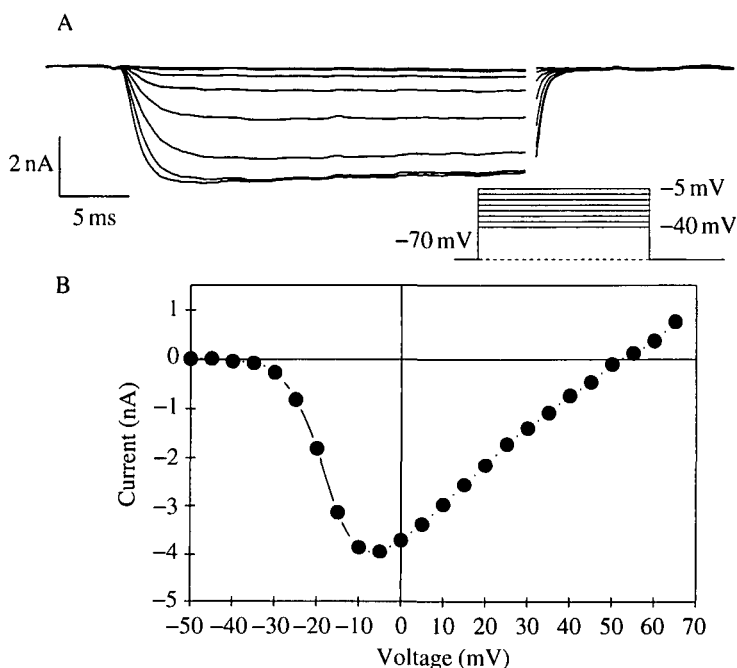

Fig. 4. The  $\text{Ba}^{2+}$  current. Whole-cell voltage-clamp records obtained with TTX ( $10^{-8} \text{ mol l}^{-1}$ ), TEA<sup>+</sup> ( $30 \text{ mmol l}^{-1}$ ) and  $\text{Ba}^{2+}$  ( $6 \text{ mmol l}^{-1}$ ) replacing  $\text{Ca}^{2+}$  in the external solution, and  $150 \text{ mmol l}^{-1}$  CsCl in the internal solution. (A) Depolarizing voltage commands evoke a sustained inward current. (B) Voltage-dependence of the peak inward current.

charge carrier. Following return to a holding potential of  $-70 \text{ mV}$ , the large  $\text{Ba}^{2+}$  current recovered from inactivation, but rarely returned to its original level. By contrast, with  $\text{Ca}^{2+}$  as the charge carrier the recovery was complete. Thus, prolonged  $\text{Ba}^{2+}$  influx may alter ion channel function or cause a build-up of internal  $\text{Ba}^{2+}$  that the cell is unable to regulate.

#### *Changes in the level of $\text{Ca}^{2+}$ currents during metamorphosis*

Leg motoneurons dissociated from fifth-instar larvae (L1), early pupae (P0) or pharate adults (P18) displayed  $\text{Ca}^{2+}$  or  $\text{Ba}^{2+}$  currents with properties similar to those described above, but the magnitude of the current was not constant during metamorphosis. The size of the currents was measured in motoneurons isolated from animals from the three stages of development, using  $\text{Ba}^{2+}$  as the charge carrier. There was a significant reduction in the level of the peak  $\text{Ba}^{2+}$  current in motoneurons dissociated from early pupae (P0) relative to that observed in cells from other stages. To correct for possible changes in cell size, the peak inward current was divided by the whole-cell capacitance to obtain a measure of current density. As shown in Figs 9 and 10, the peak  $\text{Ba}^{2+}$  current density during the early pupal stage was significantly less than in motoneurons from larvae or stage 18

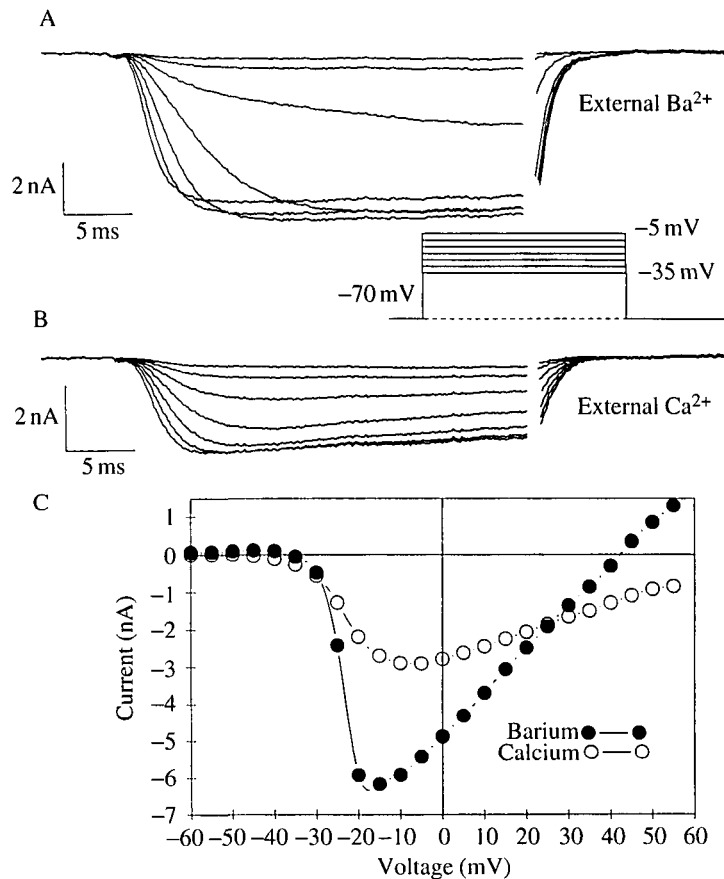

Fig. 5. Comparison of the sustained inward current with Ca<sup>2+</sup> and Ba<sup>2+</sup> as the charge carriers. (A) Whole-cell voltage-clamp records obtained as in Fig. 4. (B) The same motoneuron as in A, but after changing the external solution to one containing 6 mmol l<sup>-1</sup> Ca<sup>2+</sup> rather than Ba<sup>2+</sup>. Note that the inward current is smaller and decays more rapidly. (C) Voltage-dependence of the peak inward currents with Ca<sup>2+</sup> and Ba<sup>2+</sup> as the charge carriers.

animals. Both components of the Ba<sup>2+</sup> current were present in all stages and displayed similar voltage sensitivities, with the inactivating component always being larger than the sustained component.

The calculated whole-cell capacitance values increased somewhat during metamorphosis (L1=136±27 pF; P0=185±27 pF; P18=207±44 pF; mean±s.e.m.), as expected given the small increase in cell size. It should be noted, however, that these values are 2–3 times those predicted for spherical cells with diameters in the range observed for the leg motoneurons (30–50 μm) and with a specific membrane capacitance of 1 μF cm<sup>-2</sup>, suggesting that there is significant infolding of the surface membrane. Sections through thoracic ganglia reveal that such infoldings are a feature of these motoneurons *in vivo* (R. Cantera and R. B. Levine, unpublished observations).

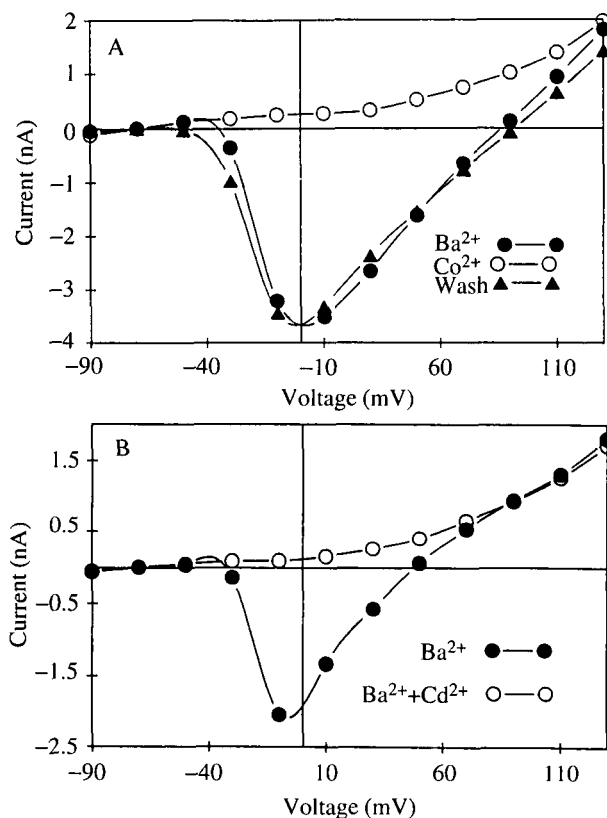

Fig. 6. Blockage of the  $\text{Ba}^{2+}$  current in leg motoneurons. (A) Current/voltage relationship of the peak inward current obtained with the whole-cell voltage-clamp technique as in Fig. 4. Changing from an external solution containing  $\text{Ba}^{2+}$  ( $6 \text{ mmol l}^{-1}$ ) to one containing  $\text{Co}^{2+}$  ( $6 \text{ mmol l}^{-1}$ ) blocks the inward current reversibly. (B) In a similar experiment, adding  $\text{Cd}^{2+}$  ( $500 \mu\text{mol l}^{-1}$ ) to the  $\text{Ba}^{2+}$ -containing external solution blocked the inward current irreversibly.

#### Potassium currents

To isolate  $\text{K}^+$  currents,  $\text{Na}^+$  currents were blocked with TTX and  $\text{Ca}^{2+}$  currents were blocked either with  $\text{Cd}^{2+}$  or by substituting  $\text{Ni}^{2+}$  for  $\text{Ca}^{2+}$ . No differences in the outward currents between the two blocking techniques were noted. Outward currents were similar whether the internal solution contained potassium aspartate or KCl. Under these conditions, the response to depolarizing voltage commands differed depending upon the stage from which the cells were dissociated (see below). The following description applies to motoneurons cultured from fifth-instar larvae (L1).

From a holding potential of  $-70 \text{ mV}$ , leg motoneurons responded to depolarizing commands with a large transient outward current followed by a sustained outward current that decreased gradually with time (Figs 11A and 12C). The current/voltage relationship was measured for the peak of the transient outward

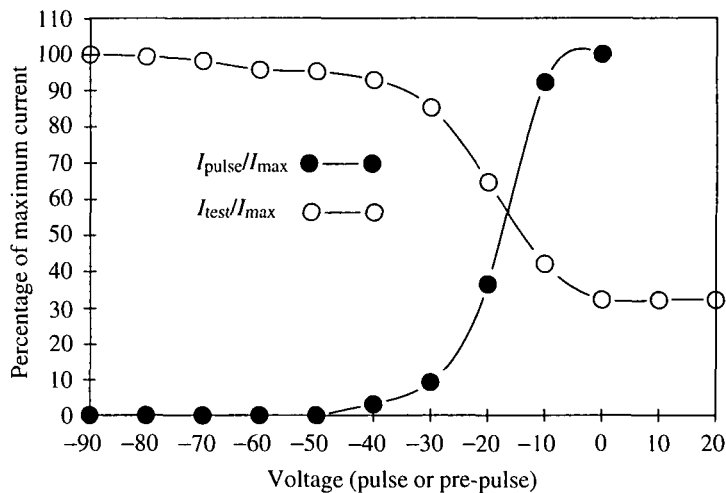

Fig. 7. Steady-state inactivation of the  $\text{Ca}^{2+}$  current. Whole-cell voltage-clamp of a leg motoneuron with  $\text{Ca}^{2+}$ , TTX and  $\text{TEA}^+$  in the external solution and  $150 \text{ mmol l}^{-1}$  CsCl in the internal solution. Open circles, the cell was held at  $-70 \text{ mV}$  and stepped to  $-10 \text{ mV}$  test pulses following  $120 \text{ ms}$  pre-pulses to the membrane potentials shown on the x-axis. The peak inward current during the test pulse ( $I_{\text{test}}$ ) is plotted as the percentage of the maximum current evoked ( $I_{\text{max}}$ ; pre-pulse of  $-90 \text{ mV}$ ). Filled circles, the peak inward current evoked with pulses to the membrane potentials shown on the x-axis ( $I_{\text{pulse}}$ ) is plotted as a percentage of the current evoked by a step to  $0 \text{ mV}$  ( $I_{\text{max}}$ ).

current and compared to that of the sustained component (measured at the end of  $30 \text{ ms}$  depolarizing steps). The transient component activated at about  $-30 \text{ mV}$  (Fig. 11B), whereas the sustained current had a higher threshold for activation (about  $0 \text{ mV}$ ; Fig. 11B), although the threshold of the sustained current was difficult to measure precisely because of contamination from the falling phase of the transient component. The transient component of the outward current was reduced by external 4-AP (4-aminopyridine,  $10 \text{ mmol l}^{-1}$ ; Fig. 12A,B), which also caused a small decrease in the sustained component.  $\text{TEA}^+$  ( $30 \text{ mmol l}^{-1}$ ) reduced both the transient and sustained outward currents (Fig. 12C,D). Both blockers took 2–4 min for full effect and were reversible.

The activation and inactivation kinetics of the transient component of the outward current were voltage-dependent. The time-to-peak decreased with more depolarized voltage commands (Figs 11A, 12A and 13A). Similarly, the time constant of inactivation became faster for more depolarizing voltage steps (Figs 11A, 12A and 13B). The voltage-dependence of steady-state inactivation for the transient component of the outward current was determined with double-pulse experiments. Inactivation was removed entirely at  $-90 \text{ mV}$  and was maximal at about  $-10 \text{ mV}$  (Fig. 13C). The inactivating outward current is similar to the A currents that are present in many neurons (Connor and Stevens, 1971), including other insect cells (Saito and Wu, 1991; Solc and Aldrich, 1988; Laurent, 1991; Salkoff and Wyman, 1983). The sustained component of the outward current is

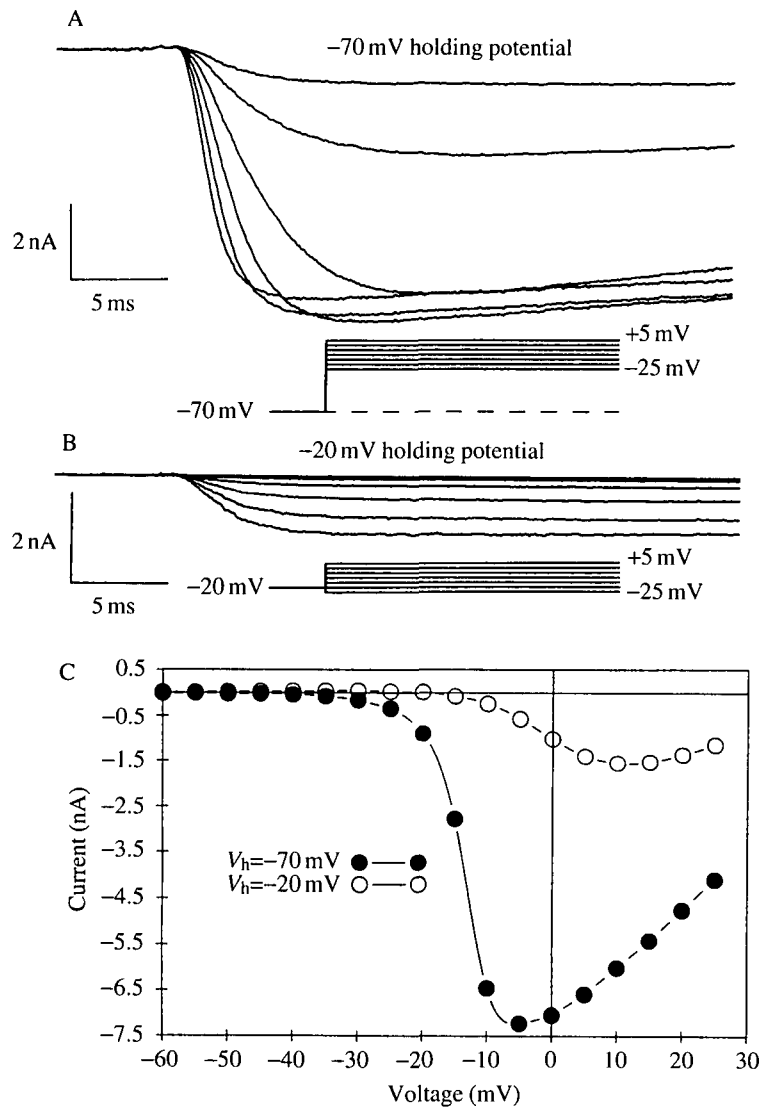

Fig. 8. Current/voltage relationships of the  $\text{Ba}^{2+}$  current with holding potentials of  $-70$  mV and  $-20$  mV. (A) Whole-cell voltage-clamp records of a leg motoneuron with  $\text{Ba}^{2+}$ , TTX and  $\text{TEA}^+$  in the external solution and CsCl in the internal solution. The cell was held at  $-70$  mV and stepped to the depolarized potentials shown. (B) Same cell as A, but now with a holding potential of  $-20$  mV. Note that a smaller, but non-inactivating, inward current is evoked by depolarizing commands. (C) Voltage-sensitivity of the peak inward current with holding potentials of  $-70$  mV and  $-20$  mV.

similar to the 'delayed rectifier'  $\text{K}^+$  current also common to many types of insect cells (Singh and Wu, 1989; Laurent, 1991; Salkoff and Wyman, 1983; Byerly and Leung, 1988; Solc and Aldrich, 1988; Christensen *et al.* 1988; Zufall *et al.* 1991).

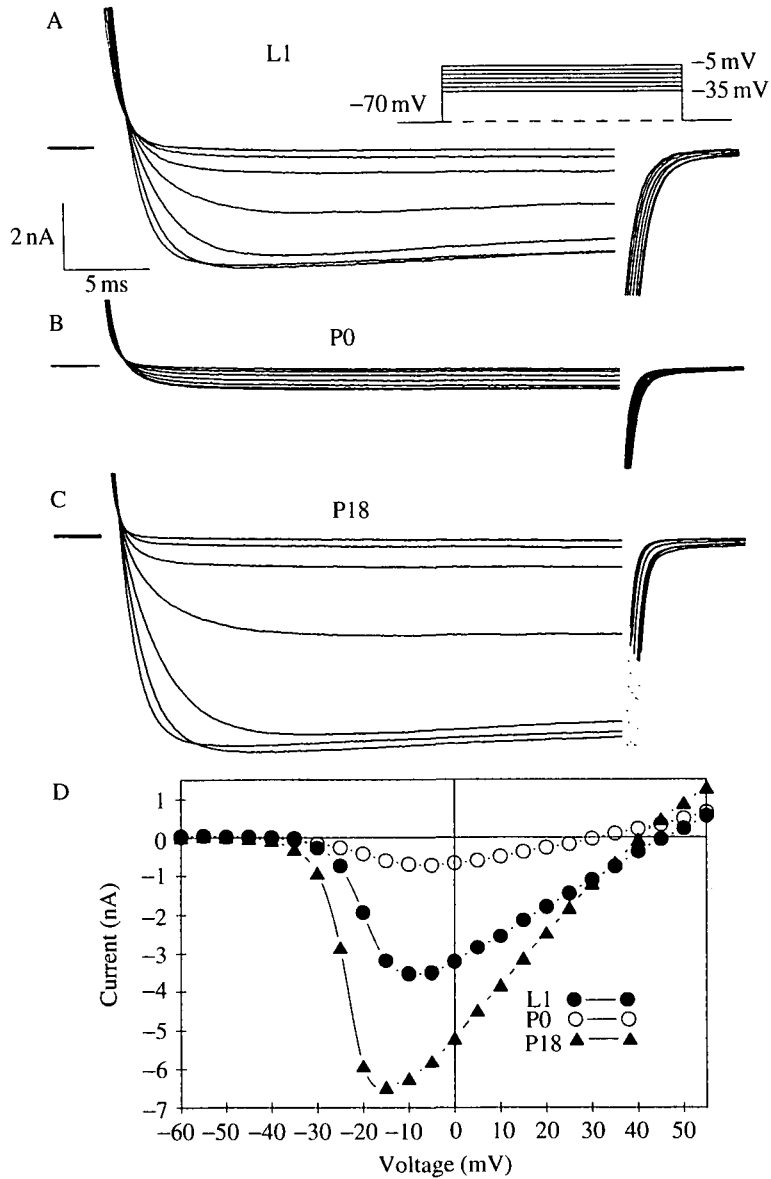

Fig. 9. Comparison of the  $\text{Ba}^{2+}$  current at different stages of metamorphosis. (A) Whole-cell voltage-clamp records of a leg motoneuron isolated from stage L1. The external solution contained  $\text{Ba}^{2+}$ , TTX and  $\text{TEA}^+$  and the internal solution contained CsCl. The cell was held at  $-70\text{ mV}$  and given depolarizing commands as shown. (B) Leg motoneuron from stage P0; protocol as in A. (C) Leg motoneuron from stage P18; protocol as in A. (D) Voltage-sensitivity of the peak inward currents at the three different stages. Data are from the cells shown in A–C.



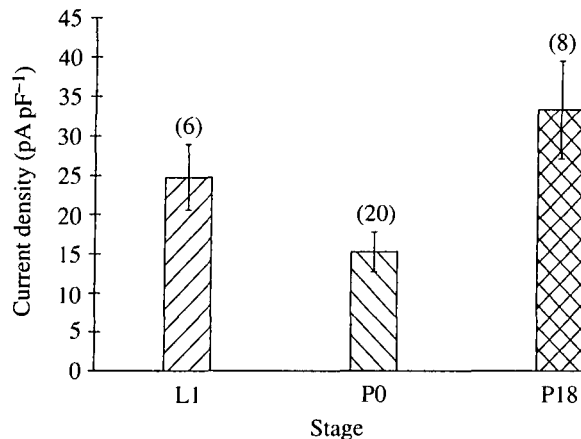

Fig. 10. Comparison of the peak  $\text{Ba}^{2+}$  current (mean  $\pm$  S.E.M.) in leg motoneurons isolated from early last instar larvae (L1), early pupae (P0) and the fully developed adult (P18). The current density was calculated by dividing the peak inward current (holding potential  $-70$  mV) by the whole-cell capacitance of each neuron. Numbers in parentheses refer to the number of neurons examined in each stage. The level of this current declines significantly in stage P0 ( $P < 0.05$ ; Student's *t*-test), before increasing during adult development ( $P < 0.05$ ).

#### *Changes in potassium currents during metamorphosis*

The levels of the transient and sustained outward currents in leg motoneurons changed during metamorphosis. Unlike the motoneurons from stage L1 and P18, those from stage P0 did not have an obvious transient component of the total outward current (Fig. 14). The relative contributions of the two components of the outward current described above were estimated by measuring the peak transient and the late outward currents for voltage steps to  $+55$  mV. The peak transient current density decreased significantly in the early pupal stage (P0), then increased during adult development (P18; Figs 14 and 15). The sustained outward current did not decrease significantly at the onset of metamorphosis, but increased significantly during adult development (Figs 14 and 15). A reduction in the level of the inactivating outward current during stage P0 was also suggested by comparing the outward currents evoked by steps to  $+55$  mV from holding potentials of  $-70$  and  $-20$  mV. A large, transient component of the outward current was eliminated at holding potentials of  $-20$  mV in stage P18 and L1 motoneurons. By contrast, cells isolated from early pupal stage animals (P0) displayed little inactivating outward current (not shown).

### **Discussion**

#### *Relevance of these findings to the normal function of motoneurons in vivo*

There have been several studies of voltage-dependent currents in insect neurons

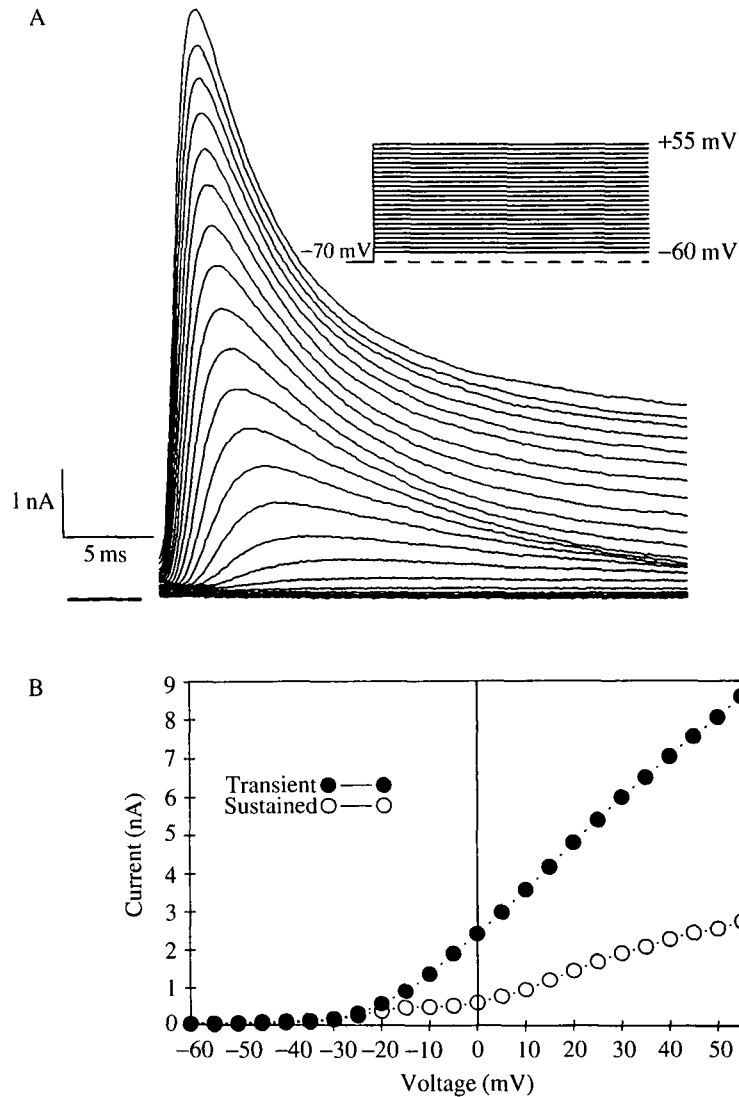

Fig. 11. Potassium currents in a leg motoneuron. (A) Whole-cell voltage-clamp record of a leg motoneuron isolated from stage L1. The external solution contained  $\text{Ba}^{2+}$  ( $6 \text{ mmol l}^{-1}$ ),  $\text{Cd}^{2+}$  ( $500 \mu\text{mol l}^{-1}$ ) and TTX ( $10^{-8} \text{ mol l}^{-1}$ ); the internal solution contained  $150 \text{ mmol l}^{-1}$  potassium aspartate. The cell was held at  $-70 \text{ mV}$  and stepped to the membrane potentials indicated in the inset. (B) Voltage-sensitivities of the peak outward current (transient) and of the current at the end of a  $30 \text{ ms}$  step (sustained).

(e.g. Leung and Byerly, 1988; Christensen *et al.* 1988; Saito and Wu, 1991; Solc and Aldrich, 1988), but few of these have focused on identified neurons (Thomas, 1984; Nightingale and Pitman, 1989; Lapied *et al.* 1990; Laurent, 1991; Hardie and Weckstrom, 1990; Zufall *et al.* 1991). One goal of examining the leg motoneurons of *Manduca sexta* was to characterize the specific biophysical properties of these

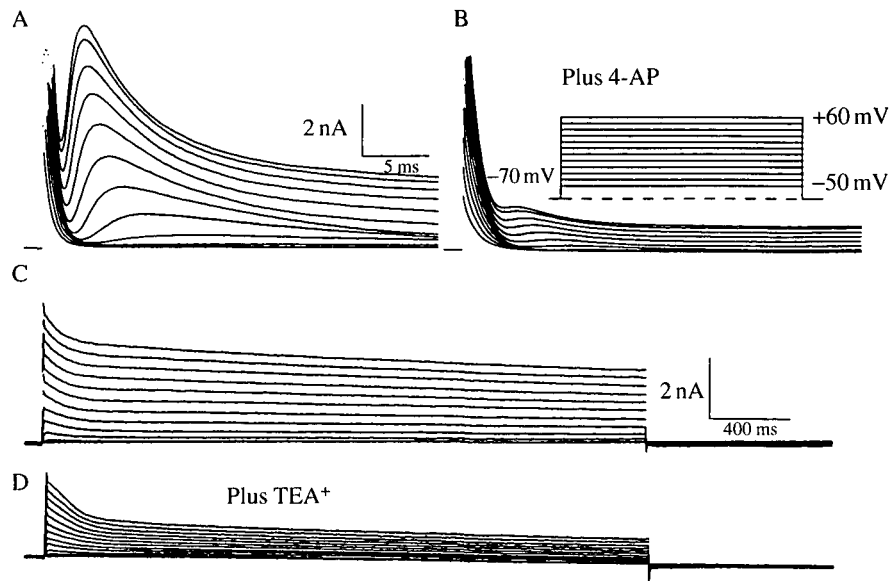

Fig. 12. Effect of potassium channel blockers on the outward currents. (A) A leg motoneuron isolated from a stage L1 animal was held at  $-70$  mV and given voltage commands as indicated in the inset. Internal and external solutions as in Fig. 11. (B) Same cell as in A, but with  $10 \text{ mmol l}^{-1}$  4-AP added to the external solution. (C) A leg motoneuron from stage P18; experimental protocol as in A, but longer voltage commands were given. The transient outward current is present as the brief peak at the far left of the records. (D) Same cell as C but with  $30 \text{ mmol l}^{-1}$  TEA<sup>+</sup> added to the external solution.

neurons that contribute to their activity patterns at different stages of life. Changes in the intrinsic biophysical properties of the motoneurons may contribute to the behavioral changes that accompany metamorphosis.

An important question is whether the properties of the cultured leg motoneurons represent faithfully the properties of the neurons *in vivo*. Clearly, as also observed for other insect neurons in culture (Lees *et al.* 1987), the excitable properties of the somata are different under the two conditions, as the somata do not generate action potentials under normal conditions *in vivo*. As observed with motoneurons of other insects (Goodman and Heitler, 1979; Pitman, 1979), however, the leg motoneurons of *Manduca* generate Ca<sup>2+</sup>-dependent plateau-like potentials *in vivo* after blockade of K<sup>+</sup> currents with TEA<sup>+</sup> (Levine and Ramirez, 1991). This suggests that voltage-sensitive Ca<sup>2+</sup> channels are present in or near the cell body membrane, but are normally obscured by outward currents. Intracellular EGTA also enables action potential production by insect motoneuron somata, possibly by suppressing Ca<sup>2+</sup>-dependent K<sup>+</sup> currents (Pitman, 1979). Another relevant observation is that, even in the absence of K<sup>+</sup> channel blockers, the somata of arthropod motoneurons are capable of producing overshooting action potentials following axotomy or colchicine treatment (Goodman and Heitler,

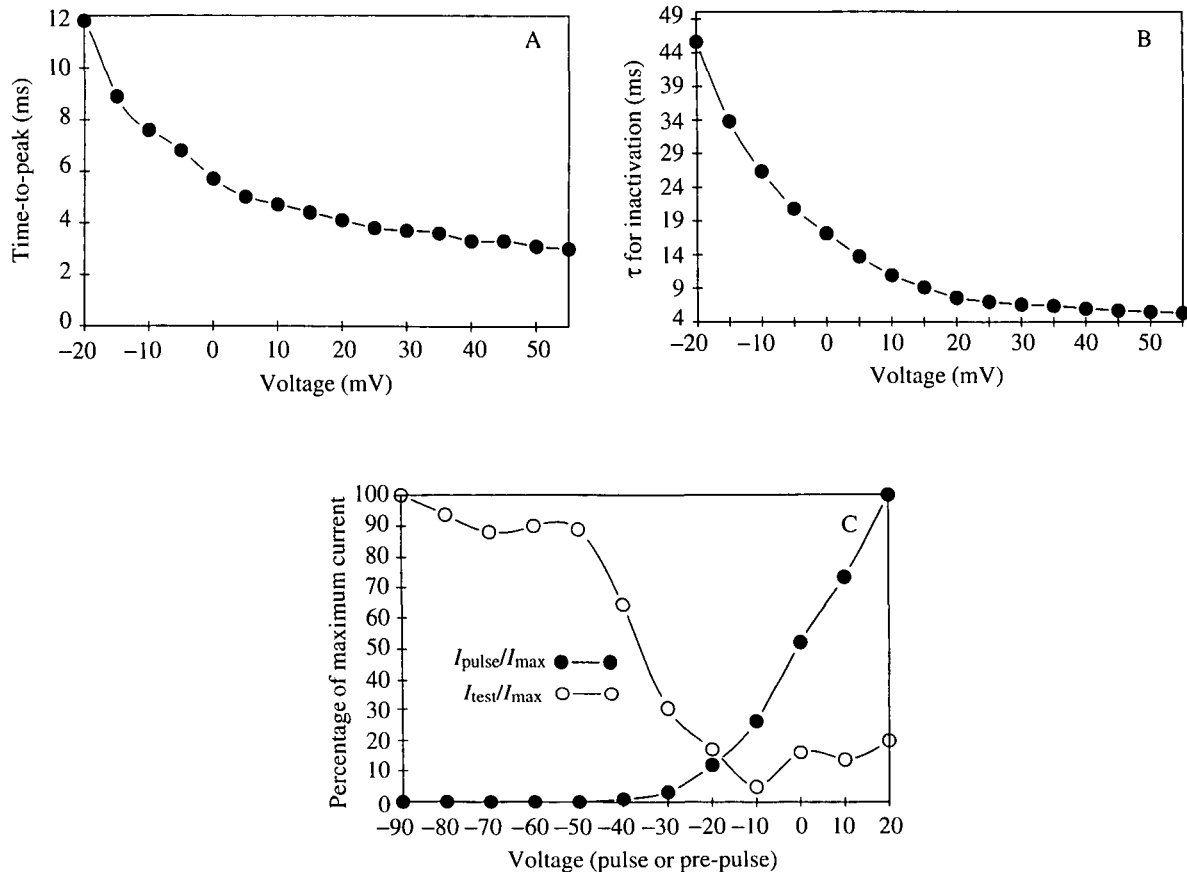

Fig. 13. Characteristics of outward currents. (A) Voltage-dependence of the rate of activation. A leg motoneuron isolated from stage L1 was held at  $-70$  mV and stepped to the membrane potentials indicated; internal and external solutions as in Fig. 11. The time-to-peak of the outward current decreases with more depolarizing commands. (B) Voltage-dependence of the inactivation time constant ( $\tau$ ). Same neuron as in A. Inactivation of the peak outward current is faster with more depolarizing commands. (C) Voltage-dependence of inactivation. Open circles, a leg motoneuron from stage L1 (external and internal solutions as in Fig. 11) was held at  $-70$  mV and stepped to  $-10$  mV following 120 ms pre-pulses to the membrane potentials indicated on the x-axis. The peak outward current ( $I_{test}$ ) was plotted as a percentage of the maximum outward current ( $I_{max}$ ; with a pre-pulse of  $-90$  mV). Filled circles, the leg motoneuron was held at  $-70$  mV and stepped to the membrane potentials indicated on the x-axis. The peak outward current ( $I_{pulse}$ ) is plotted as a percentage of the outward current evoked by a step to  $+20$  mV ( $I_{max}$ ).

1979; Pitman *et al.* 1972; Pitman, 1975; Kuwada and Wine, 1981) or after a period of anoxia (Pitman, 1988). Thus, channels normally destined for other parts of the cell may remain in the soma membrane. Determining whether the currents that are described in this paper accurately reflect those normally found in dendritic or

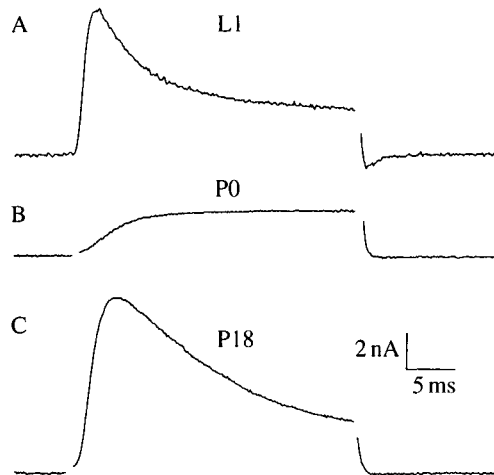

Fig. 14. Comparison of the outward currents at different stages. (A,B,C) Leg motoneurons isolated from stages L1, P0 and P18, respectively, were voltage-clamped as in Fig. 11 and stepped to +55 mV from a holding potential of -70 mV. Note that the transient outward current is much larger in cells from stages L1 and P18 than in the cell from stage P0.

axonal processes will require a more direct voltage-clamp analysis of the distal processes of the neurons in culture. Preliminary studies, in which patch electrodes were used to voltage-clamp the distal processes of motoneurons cultured for 1–2 weeks, revealed  $\text{Ca}^{2+}$  currents similar to those described in this report (J. H. Hayashi, M. D. Withers and R. B. Levine, unpublished observation). In addition, it will be important to examine in more detail the biophysical properties of the leg motoneurons *in vivo*.

One important variable that needs to be addressed more fully is the identity of the leg motoneuron. Although the present study was restricted to leg motoneurons, we did not attempt to distinguish between different identified cells. The specific biophysical properties of the cells may vary among motoneurons that innervate different leg muscles, or between slow and fast motoneurons to the same muscle.

#### Calcium currents

The leg motoneurons of *Manduca* express a relatively large  $\text{Ca}^{2+}$  current that activates at a membrane potential of about -40 mV. A component of the  $\text{Ca}^{2+}$  current, constituting about 60% of the peak current, inactivates during maintained steps to membrane potentials more depolarized than -30 to -20 mV. The time course of this inactivation is slower with  $\text{Ba}^{2+}$  as the divalent cation, suggesting that inactivation may depend partially on  $\text{Ca}^{2+}$  influx as has been observed for several cell types (Eckert and Tillotson, 1981; Tazaki and Cooke, 1990). The time-dependent decay in the inward current is unlikely to be due to a

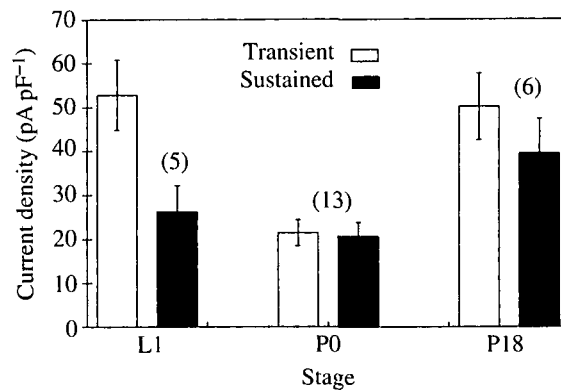

Fig. 15. Comparison of the potassium currents at different stages of metamorphosis. The open bars indicate the peak value of the transient outward current; the filled bars indicate the level of the sustained outward current at the end of a 30 ms step (mean  $\pm$  S.E.M.). Current densities were calculated as in Fig. 10. Numbers in parentheses indicate the number of leg motoneurons examined at each stage. Note that the level of the transient current declines significantly at the beginning of the pupal stage (P0) ( $P < 0.05$ ; Student's *t*-test), then increases again during adult development ( $P < 0.05$ ). The sustained outward current does not decline significantly at the onset of pupation, but increases significantly during adult development ( $P < 0.05$ ).

$\text{Ca}^{2+}$ -dependent  $\text{K}^+$  current, since such currents should be blocked by the use of internal  $\text{Cs}^+$ . The small component of the  $\text{Ba}^{2+}$  or  $\text{Ca}^{2+}$  current that persists when the cells are maintained for several seconds at depolarized holding potentials may represent an independent class of  $\text{Ca}^{2+}$  channels or may reflect a small fraction of the channels in a single class that remain available for activation even after prolonged depolarizing steps. The former possibility is suggested by the change in the voltage threshold and peak of the  $I/V$  relationship when the holding potential is changed from  $-70$  to  $-20$  mV. Our ability to distinguish between these possibilities awaits single-channel measurements or a selective blocker that could discriminate between channel types. Neurons cultured from embryonic *Drosophila* also display  $\text{Ca}^{2+}$  currents with inactivating and sustained components (Byerly and Leung, 1988; Leung *et al.* 1989; Leung and Byerly, 1991). The non-inactivating component is blocked preferentially by a venom fraction from the spider, *Hololena curta* (Leung *et al.* 1989), suggesting the presence of at least two channel types.

A variety of  $\text{Ca}^{2+}$  currents have been described in other invertebrate preparations; some with relatively low thresholds similar to the inactivating current described in the present report (Augustine *et al.* 1987; Tazaki and Cooke, 1990; Angstadt and Calabrese, 1991) and others with higher thresholds (Johansen *et al.* 1987).  $\text{Ca}^{2+}$  currents that have been described in the neurons of other insects are generally similar to those found in the leg motoneurons of *Manduca* (Leung *et al.* 1989; Christensen *et al.* 1988). A voltage-clamp analysis of  $\text{Ca}^{2+}$  currents in

antennal-lobe interneurons of *Manduca* also revealed similar properties (Hayashi and Hildebrand, 1990). The  $\text{Ca}^{2+}$  currents in *Manduca* neurons do not correspond clearly to any of the three types of channels described for vertebrate neurons (Nowycky *et al.* 1985; Fox *et al.* 1987*a,b*) in terms of their profiles of threshold, inactivation kinetics and sensitivity to inorganic blockers. In addition, the  $\text{Ca}^{2+}$  currents in *Manduca* leg motoneurons were insensitive to organic blockers, such as conotoxin and dihydropyridines, that have helped to distinguish between the channel types found in vertebrate neurons (J. H. Hayashi and R. B. Levine, unpublished observation).

#### Potassium currents

*Manduca* leg motoneurons express voltage-sensitive outward currents that are blocked by extracellular  $\text{TEA}^+$  and 4-AP and by substituting  $\text{Cs}^+$  for  $\text{K}^+$  in the internal solution. Outward currents were similar with KCl or potassium aspartate in the intracellular solution. Based on these observations, we conclude that these outward currents are carried by  $\text{K}^+$ . We have divided these  $\text{K}^+$  currents into transient (rapidly inactivating) and late (slowly or non-inactivating) components. Similar studies of cultured neurons from embryonic (Saito and Wu, 1991), larval (Solc and Aldrich, 1988) and pupal (Baker and Salkoff, 1990) *Drosophila*, and single-electrode voltage-clamp studies of non-spiking interneurons in the locust (Laurent, 1991), have revealed  $\text{K}^+$  currents with comparable properties. The two components were sensitive to 4-AP and  $\text{TEA}^+$  as reported in other systems, but it is not clear that the blockers can be used to separate the two components reliably. The small reduction in the late outward current that was caused by 4-AP may reflect an effect on the falling phase of the transient current, although the same reduction in the late current was observed during longer voltage steps.

The rapidly inactivating  $\text{K}^+$  current (or A current) observed in cultured *Drosophila* neurons (Solc and Aldrich, 1988) is generally distinguished from that in muscle (Zagotta *et al.* 1988; Salkoff and Wyman, 1983; Singh and Wu, 1989) on the basis of several characteristics. The A current measured from the somata of cultured neurons ( $\text{A}_2$  channels) has an activation threshold of about  $-50$  mV, whereas that of the A current in muscle ( $\text{A}_1$  channels) is 20 mV more depolarized. In addition, the muscle A current has a more depolarized steady-state inactivation curve and a faster inactivation rate and its rate of inactivation is voltage-dependent, unlike that of neurons.  $\text{A}_1$  channels from muscle are dependent upon the *shaker* locus (Salkoff and Wyman, 1981*b*; Wu and Haugland, 1985; Timpe and Jan, 1987), whereas  $\text{A}_2$  channels in neurons are *shaker*-independent (Solc *et al.* 1987; Baker and Salkoff, 1990). Interestingly, the *shaker* mutation causes hyperexcitability of presynaptic terminals (Jan *et al.* 1977; Ganetzky and Wu, 1982) and broadening of giant fiber action potentials (Tanouye *et al.* 1981), leading to the suggestion that  $\text{A}_1$  channels may be the predominant contributors to A currents in neuronal processes, while  $\text{A}_2$  channels predominate on the soma (Solc and Aldrich, 1988).

The rapidly inactivating component of the  $\text{K}^+$  current observed in *Manduca* leg

motoneurons shares many features of A currents from other systems, including sensitivity to 4-AP. The leg motoneuron current seems to be most like that ascribed to  $A_1$  channels in *Drosophila*, in terms of its activation threshold, steady-state inactivation and the voltage-dependence of its inactivation time constant. One possibility is that after 1 day in culture the motoneuron somata are expressing A currents that would normally be destined for the processes. The rather positive values at which the leg motoneuron A current inactivates suggest that it might normally be important for action potential repolarization (McCobb *et al.* 1990). This is consistent with the finding that the action potential width was increased when it was evoked from motoneurons at depolarized membrane potentials.

A second component of the  $K^+$  current in *Manduca* leg motoneurons did not inactivate fully during prolonged steps to depolarized membrane potentials and was less sensitive to 4-AP. This current was also partially blocked by  $30 \text{ mmol l}^{-1}$  TEA<sup>+</sup>. It thus displays many characteristics of the delayed rectifier  $K^+$  currents described in *Drosophila* (Solc and Aldrich, 1988; Singh and Wu, 1989) and *Manduca* (Zufall *et al.* 1991).

Our separation of outward currents into two components is probably an oversimplification. Multiple species of  $K^+$  channels are derived from alternative splicing of the *shaker* locus (Schwartz *et al.* 1988; Pongs *et al.* 1988; Kamb *et al.* 1988) and from members of the extended *shaker* gene family in *Drosophila* (Wei *et al.* 1990). Voltage-clamp studies have revealed multiple variants of the rapidly inactivating  $K^+$  currents in neurons (Baker and Salkoff, 1990), many of which do not depend upon the *shaker* locus. Similarly, Solc and Aldrich (1988) distinguish between slowly inactivating ( $K_D$ ) and non-inactivating ( $K_1$ )  $K^+$  channels in *Drosophila* neurons, which may have been considered together in our studies. We also did not examine the possible expression of  $\text{Ca}^{2+}$ - or  $\text{Na}^+$ -dependent  $K^+$  currents in the leg motoneurons. Cation-dependent  $K^+$  currents, which contribute significantly to the outward current in other insect neurons (Thomas, 1984; Nightingale and Pitman, 1989), would not have been observed under the conditions used in the present experiments. A complete analysis of the channel species expressed by the leg motoneurons also awaits measurements of single-channel currents.

#### *Changes in currents during metamorphosis*

A comparison of the voltage-gated currents in leg motoneurons at different stages of metamorphosis reveals that the levels of  $\text{Ca}^{2+}$  and inactivating  $K^+$  currents decline during the early pupal stage relative to those in the larva and fully developed adult. This decline was not due to changes in cell size, as we corrected for differences between the whole-cell capacitances at different stages. Furthermore, the levels of the sustained outward currents did not change in parallel.

Two basic mechanisms could account for the reduction in current densities: either the number of channels expressed changes as a function of developmental stage, or the properties of individual channels are modified such that they have a lower conductance during the early pupal stage. The latter could involve the



expression of a different channel protein or the modulation (e.g. through phosphorylation) of the same channel species. Pending the measurement of single-channel currents we cannot distinguish between these possibilities.

The relevance of the changes in current density may lie in the modified behavioral role of the leg motoneurons during metamorphosis. During the larval stage these motoneurons innervate leg muscles and participate in crawling, grasping and ecdysis behavior patterns (Kent and Levine, 1988a). At the end of the larval stage, the leg muscles degenerate, and the processes of the leg motoneurons, both within the central nervous system and at the periphery, undergo substantial regression (Kent and Levine, 1988b; 1992; K. S. Kent and R. B. Levine, unpublished observations). Although they continue to receive some synaptic inputs and maintain the ability to generate action potentials (Kent and Levine, 1988b, 1992), the leg motoneurons do not evoke movements during the early pupal stage. During adult development, the leg motoneurons grow new dendrites, receive new synaptic inputs and form new neuromuscular junctions with newly generated muscles of the adult legs (Kent and Levine, 1988b; 1992; K. S. Kent and R. B. Levine, unpublished observations). In the adult, these neurons participate in leg movements associated with emergence and walking as well as in various defensive and grooming reflexes. Thus, the decrease in current density could be important for alterations in the activity patterns of the leg motoneurons during metamorphosis, either as a stage in the transition between larval and adult properties or to allow activity patterns that may be unique to the pupal stage. Alternatively, the decrease in channel density could simply reflect a quiescent period for the leg motoneurons, during which they decrease channel synthesis transiently. A final possibility is that the alterations in channel density are important for regulating activity levels during critical developmental events, such as growth-cone extension or synapse formation (Mattson and Kater, 1987; Holliday and Spitzer, 1990). It will be instructive to compare the properties of the leg motoneurons during the pupal stage to those of other motoneurons that do not undergo dendritic changes or innervate new muscles during metamorphosis (Levine and Truman, 1985).

Preliminary studies indicate that the changes in voltage-gated currents that we have observed by analyzing neurons dissociated from animals of different stages are recapitulated by neurons that have been dissociated at early stages and maintained for extended periods *in vitro*. This protocol will be essential in determining whether the alterations in currents are regulated by the steroid hormone, 20-hydroxyecdysone, that is responsible for other developmental changes during metamorphosis (Levine and Weeks, 1990; Prugh *et al.* 1992).

The authors wish to thank Drs Lynne Oland and Monika Stengl for their helpful comments on the manuscript. Laura Griffin, John Prugh, Kimiko Della Croce and Maria DeMenezes y Ferriera provided excellent technical assistance. The work was supported by NIH grant NS 28495.

## References

- ANGSTADT, J. D. AND CALABRESE, R. L. (1991). Calcium currents and graded synaptic transmission between heart interneurons of the leech. *J. Neurosci.* **11**, 746–759.
- ATKINSON, N. S., ROBERTSON, G. A. AND GANETZKY, B. (1991). A component of calcium-activated potassium channels encoded by the *Drosophila slo* locus. *Science* **253**, 551–555.
- AUGUSTINE, G. J., CHARLTON, M. P. AND SMITH, S. J. (1987). Calcium action in synaptic transmitter release. *A. Rev. Neurosci.* **10**, 633–693.
- BAKER, K. AND SALKOFF, L. (1990). The *Drosophila shaker* gene codes for a distinctive potassium current in a subset of neurons. *Neuron* **2**, 129–140.
- BELL, R. A. AND JOACHIM, F. A. (1976). Techniques for rearing laboratory colonies of tobacco hornworms and pink bollworms. *Ann. ent. Soc. Am.* **69**, 365–373.
- BYERLY, L. AND LEUNG, H. T. (1988). Ionic currents of *Drosophila* neurons in embryonic cultures. *J. Neurosci.* **8**, 4379–4393.
- CHRISTENSEN, B. N., LARMET, Y., SHIMAHARA, T., BEADLE, D. AND PICHON, Y. (1988). Ionic currents in neurones cultured from embryonic cockroach (*Periplaneta americana*) brains. *J. exp. Biol.* **135**, 193–214.
- CONNOR, J. A. AND STEVENS, C. F. (1971). Voltage clamp study of a transient outward membrane current in gastropod neural somata. *J. Physiol., Lond.* **213**, 21–30.
- ECKERT, R. AND TILLOTSON, D. L. (1981). Calcium-mediated inactivation of the calcium conductance in caesium-loaded giant neurones of *Aplysia californica*. *J. Physiol., Lond.* **314**, 265–280.
- FENWICK, E. M., MARTY, A. AND NEHER, E. (1982). A patch-clamp study of bovine chromaffin cells and of their sensitivity to acetylcholine. *J. Physiol., Lond.* **331**, 577–587.
- FOX, A. P., NOWYCKY, M. C. AND TSIEN, R. W. (1987a). Kinetic and pharmacological properties distinguishing three types of calcium currents in chick sensory neurons. *J. Physiol., Lond.* **394**, 149–172.
- FOX, A. P., NOWYCKY, M. C. AND TSIEN, R. W. (1987b). Single-channel recordings of three types of calcium channels in chick sensory neurones. *J. Physiol., Lond.* **394**, 173–200.
- GANETZKY, B. AND WU, C-F. (1982). *Drosophila* mutants with opposing effects on nerve excitability: genetic and spatial interactions in repetitive firing. *J. Neurophysiol.* **47**, 501–514.
- GOODMAN, C. S. AND HEITLER, W. J. (1979). Electrical properties of insect neurones with spiking and non-spiking somata: normal, axotomized, and colchicine treated neurones. *J. exp. Biol.* **83**, 95–121.
- GRIFFIN, L. AND LEVINE, R. B. (1989). Hormonal influences on insect motoneurons developing in cell culture. *Soc. Neurosci. Abstr.* **15**, 87.
- HAMILL, O. P., MARTY, A., NEHER, E., SAKMANN, B. AND SIGWORTH, F. J. (1981). Improved patch-clamp techniques for high resolution current recording from cells and cell-free membrane patches. *Pflügers Arch.* **391**, 85–100.
- HARDIE, R. C. AND WECKSTROM, M. (1990). Three classes of potassium channels in large monopolar cells in the blowfly *Callifora vicina*. *J. comp. Physiol.* **167A**, 723–736.
- HAYASHI, J. H. AND HILDEBRAND, J. G. (1990). Insect olfactory neurons *in vitro*: morphological and physiological characterization of cells from the developing antennal lobes of *Manduca sexta*. *J. Neurosci.* **10**, 848–859.
- HOLLIDAY, J. AND SPITZER, N. C. (1990). Spontaneous calcium influx and its role in differentiation of spinal neurons in culture. *Devl Biol.* **141**, 13–23.
- HONIG, M. G. AND HUME, R. I. (1986). Fluorescent carbocyanine dyes allow living neurons of identified origin to be studied in long-term cultures. *J. Cell Biol.* **103**, 171–187.
- JAN, Y. N., JAN, L. Y. AND DENNIS, M. J. (1977). Two mutations of synaptic transmission in *Drosophila*. *Proc. R. Soc. Lond. B* **198**, 87–108.
- JOHANSEN, J., YANG, J. AND KLEINHAUS, A. L. (1987). Voltage-clamp analysis of the ionic conductances in a leech neuron with a purely calcium-dependent action potential. *J. Neurophysiol.* **58**, 1468–1484.
- KAMB, A., IVERSON, L. E. AND TANOUYE, M. A. (1987). Molecular characterization of *shaker*, a *Drosophila* gene that encodes a potassium channel. *Cell* **50**, 405–413.
- KAMB, A., TSENG-CRANK, J. AND TANOUYE, M. A. (1988). Multiple products of the *Drosophila shaker* gene may contribute to potassium channel diversity. *Neuron* **1**, 421–430.

- KENT, K. S. AND LEVINE, R. B. (1988a). Neural control of leg movements in a metamorphic insect: Sensory and motor elements of the larval thoracic legs in *Manduca sexta*. *J. comp. Neurol.* **271**, 559–576.
- KENT, K. S. AND LEVINE, R. B. (1988b). Neural control of leg movements in a metamorphic insect: Persistence of the larval leg motor neurons to innervate the adult legs of *Manduca sexta*. *J. comp. Neurol.* **276**, 30–43.
- KENT, K. S. AND LEVINE, R. B. (1992). Dendritic reorganization of an identified neuron during metamorphosis of the moth, *Manduca sexta*. *J. Neurobiol.* (in press).
- KUWADA, J. Y. AND WINE, J. J. (1981). Transient, axotomy-induced changes in membrane properties of crayfish central neurones. *J. Physiol., Lond.* **317**, 435–461.
- LAPIED, B., MALECOT, C. O. AND PELHATE, M. (1990). Patch-clamp study of the properties of the sodium current in cockroach single isolated adult aminergic neurones. *J. exp. Biol.* **151**, 387–403.
- LAURENT, G. (1991). Evidence for voltage-activated outward currents in the neuropilar membrane of locust nonspiking local interneurons. *J. Neurosci.* **11**, 1713–1726.
- LEES, G., BEADLE, D. J., NEUMANN, R. AND BENSON, J. A. (1987). Responses to GABA by isolated insect neuronal somata: pharmacology and modulation by a benzodiazepine and a barbiturate. *Brain Res.* **401**, 267–278.
- LEUNG, H. T., BRANTON, W. D., PHILLIPS, H. S., JAN, L. AND BYERLY, L. (1989). Spider toxins selectively block calcium currents in *Drosophila*. *Neuron* **3**, 767–772.
- LEUNG, H. T. AND BYERLY, L. (1991). Characterization of single calcium channels in *Drosophila* embryonic nerve and muscle cells. *J. Neurosci.* **11**, 3047–3059.
- LEVINE, R. B. AND HAYASHI, J. H. (1990). Calcium channels in insect motoneurons during metamorphosis. *Soc. Neurosci. Abstr.* **16**, 177.
- LEVINE, R. B. AND RAMIREZ, J. M. (1991). Calcium-dependent plateau potentials in the leg motoneurons of *Manduca*. *Soc. Neurosci. Abstr.* **17**, 1227.
- LEVINE, R. B. AND TRUMAN, J. W. (1985). Dendritic reorganization of abdominal motoneurons during metamorphosis of the moth, *Manduca sexta*. *J. Neurosci.* **5**, 2424–2431.
- LEVINE, R. B. AND WEEKS, J. C. (1990). Hormonally mediated changes in simple reflex circuits during metamorphosis in *Manduca*. *J. Neurobiol.* **21**, 1022–1036.
- LEWIS, R. S. AND HUDSPETH, A. J. (1983). Voltage- and ion-dependent conductances in solitary vertebrate hair cells. *Nature* **304**, 538–541.
- MATTSON, M. P. AND KATER, S. B. (1987). Calcium regulation of neurite elongation and growth cone motility. *J. Neurosci.* **7**, 4034–4043.
- MCCOBB, D. P., BEST, P. M. AND BEAM, K. G. (1989). Development alters the expression of calcium current in chick limb motoneurons. *Neuron* **2**, 1633–1643.
- MCCOBB, D. P., BEST, P. M. AND BEAM, K. G. (1990). The differentiation of excitability in embryonic chick limb motoneurons. *J. Neurosci.* **10**, 2974–2984.
- NIGHTINGALE, W. D. AND PITMAN, R. M. (1989). Ionic currents in the soma of an identified cockroach motoneurone recorded under voltage clamp. *Comp. Biochem. Physiol.* **93A**, 85–93.
- NOWYCKY, M. C., FOX, A. P. AND TSIEN, R. W. (1985). Three types of neuronal calcium channels with different calcium agonist sensitivity. *Nature* **316**, 440–443.
- O'DOWD, D. K. AND ALDRICH, R. W. (1988). Voltage-clamp analysis of sodium channels in wild-type and mutant *Drosophila* neurons. *J. Neurosci.* **8**, 3633–3643.
- O'DOWD, D. K., RIBERA, A. B. AND SPITZER, N. C. (1988). Development of voltage dependent calcium, sodium, and potassium currents in *Xenopus* spinal neurons. *J. Neurosci.* **8**, 792–805.
- PAPAZIAN, D. M., SCHWARZ, T. Z., TEMPEL, B. L., JAN, Y. N. AND JAN, L. Y. (1987). Cloning of genomic and complementary DNA from *shaker*, a putative potassium channel gene from *Drosophila*. *Science* **237**, 749–753.
- PITMAN, R. M. (1975). The ionic dependence of action potentials induced by colchicine in an insect motoneurone cell body. *J. Physiol., Lond.* **247**, 511–520.
- PITMAN, R. M. (1979). Intracellularly applied citrate or externally applied tetraethylammonium ions produce calcium-dependent action potentials in an insect motoneurone cell body. *J. Physiol., Lond.* **291**, 327–337.
- PITMAN, R. M. (1988). Delayed effects of anoxia upon the electrical properties of an identified cockroach motoneurone. *J. exp. Biol.* **135**, 95–108.

- PITMAN, R. M., TWEEDLE, C. D. AND COHEN, M. J. (1972). Electrical responses of insect central neurones: augmentation by nerve section or colchicine. *Science* **178**, 507–509.
- PONGS, D., KECSKEMETHY, N., MUELLER, R., KRAH-JENTGENS, I., GAUMANN, A., KILTZ, H., CANAL, I., LLAMAZARES, S. AND FERCUS, A. (1988). *Shaker* encodes a family of putative potassium channel proteins in the nervous system of *Drosophila*. *EMBO J.* **7**, 1087–1096.
- PRUGH, J., DELLA CROCE, K. AND LEVINE, R. B. (1992). Effects of the steroid hormone, 20-hydroxyecdysone, on the growth of neurites by identified insect motoneurons *in vitro*. *Devl Biol.* (in press).
- SAITO, M. AND WU, C. F. (1991). Expression of ion channels and mutational effects in giant *Drosophila* neurons differentiated from cell division-arrested embryonic neuroblasts. *J. Neurosci.* **11**, 2135–2150.
- SALKOFF, L. AND WYMAN, R. (1981a). Outward currents in developing *Drosophila* flight muscle. *Science* **212**, 461–463.
- SALKOFF, L. AND WYMAN, R. (1981b). Genetic modification of potassium channels in *Drosophila shaker* mutants. *Nature* **293**, 228–230.
- SALKOFF, L. AND WYMAN, R. (1983). Ion currents in *Drosophila* flight muscles. *J. Physiol., Lond.* **337**, 687–709.
- SANES, J. R. AND HILDEBRAND, J. G. (1976). Structure and development of antennae in a moth, *Manduca sexta* (Lepidoptera: Sphingidae). *Devl Biol.* **51**, 282–299.
- SCHWARTZ, T. L., TEMPEL, B. L., PAPAIZIAN, D. M., JAN, Y. N. AND JAN, L. Y. (1988). Multiple potassium channel components are produced by alternative splicing at the *shaker* locus of *Drosophila*. *Nature* **331**, 137–142.
- SINGH, S. AND WU, C. F. (1989). Complete separation of four potassium currents in *Drosophila*. *Neuron* **2**, 1325–1329.
- SOLC, C. K. AND ALDRICH, R. W. (1988). Voltage-gated potassium channels in larval CNS neurons of *Drosophila*. *J. Neurosci.* **8**, 2556–2570.
- SOLC, C. K., ZAGOTTA, W. N. AND ALDRICH, R. W. (1987). Single-channel and genetic analysis reveal two distinct A-type potassium channels in *Drosophila*. *Science* **236**, 1094–1098.
- TANOUE, M. A., FERRUS, A. AND FUJITA, S. C. (1981). Abnormal action potentials associated with the *shaker* complex locus of *Drosophila*. *Proc. natn. Acad. Sci. U.S.A.* **78**, 6548–6552.
- TAZAKI, K. AND COOKE, I. M. (1990). Characterization of Ca currents underlying burst formation in lobster cardiac ganglion motoneurons. *J. Neurophysiol.* **63**, 370–384.
- THOMAS, M. V. (1984). Voltage-clamp analysis of a calcium-mediated potassium conductance in cockroach (*Periplaneta americana*) central neurones. *J. Physiol., Lond.* **350**, 159–178.
- TIMPE, L. C. AND JAN, L. Y. (1987). Gene dosage and complementation analysis of the *shaker* locus in *Drosophila*. *J. Neurosci.* **7**, 1307–1317.
- TOLBERT, L. P., MATSUMOTO, S. G. AND HILDEBRAND, J. G. (1983). Development of synapses in the antennal lobe of the moth *Manduca sexta* during metamorphosis. *J. Neurosci.* **3**, 1158–1175.
- WEEKS, J. C. AND ERNST-UTZSCHNEIDER, K. (1989). Respecification of larval proleg motoneurons during metamorphosis of the tobacco hornworm, *Manduca sexta*: segmental dependence and hormonal regulation. *J. Neurobiol.* **20**, 569–592.
- WEI, W., COVARRUBIAS, M., BUTLER, A., BAKER, K., PAK, M. AND SALKOFF, L. (1990). K<sup>+</sup> current diversity is produced by an extended gene family conserved in *Drosophila* and mouse. *Science* **248**, 599–603.
- WU, C. F. AND HAUGLAND, F. N. (1985). Voltage clamp analysis of membrane currents in larval muscle fibers of *Drosophila*: Alteration of potassium currents in *shaker* mutants. *J. Neurosci.* **10**, 2626–2640.
- ZAGOTTA, W. N., BRAINARD, M. S. AND ALDRICH, R. W. (1988). Single-channel analysis of four distinct classes of potassium channels in *Drosophila* muscle. *J. Neurosci.* **8**, 4765–4779.
- ZUFALL, F., STENGL, M., FRANKE, C., HILDEBRAND, J. G. AND HATT, H. (1991). Ionic currents of cultured olfactory receptor neurons from antennae of male *Manduca sexta*. *J. Neurosci.* **11**, 956–965.
